# Supplementary material for: Prospective Evaluation of Automated Contouring for CT-Based Brachytherapy for Gynecologic Malignancies
Source: PubMed Central journal article supplement — Adv Radiat Oncol. 2023 Dec 10;9(4):101417. doi: 10.1016/j.adro.2023.101417 (PMC10906166; doi:10.1016/j.adro.2023.101417), 2023-12-10
Supplement: mmc1.pdf [file mmc1.pdf]

**Table S1.** Summary of clinical goals used in retrospective and prospective cases.

| Structure              | Priority | Objective                        | Varian        |
|------------------------|----------|----------------------------------|---------------|
| 700 cGy x 4 Fx = 28 Gy |          |                                  |               |
| CTV_High               | P1       | D 90.0 % > 2800 cGy              | > 2520.00 cGy |
| CTV_High               | P1       | V 2800 cGy > 95.0 %              | > 90.00 %     |
| CTV_Mid                | P1       | V 1400 cGy > 95.0 %              | > 90.00 %     |
| Ureter                 | P2       | D 0.1 cm <sup>3</sup> < 2060 cGy | < 2320.00 cGy |
| Bladder                | P2       | D 2.0 cm <sup>3</sup> < 2200 cGy | < 2520.00 cGy |
| Rectum                 | P2       | D 2.0 cm <sup>3</sup> < 1560 cGy | < 2000.00 cGy |
| Colon_Sigmoid          | P2       | D 2.0 cm <sup>3</sup> < 1800 cGy | < 2000.00 cGy |
| Bowel_Small            | P2       | D 2.0 cm <sup>3</sup> < 1800 cGy | < 2000.00 cGy |
| Urethra                | P2       | D 0.1 cm <sup>3</sup> < 2200 cGy | < 2520.00 cGy |
| 600 cGy x 4 Fx = 24 Gy |          |                                  |               |
| CTV_High               | P1       | D 90.0 % ≥ 100.0 %               | > 90.00%      |
| CTV_High               | P1       | V 100.0 % ≥ 95.0 %               | > 90.00 %     |
| CTV_Mid                | P1       | V 50.0 % ≥ 95.0 %                | > 90.00 %     |
| Bladder                | P2       | D 2.0 cm <sup>3</sup> < 2200 cGy | < 2520.00 cGy |
| Rectum                 | P2       | D 2.0 cm <sup>3</sup> < 1560 cGy | < 2000.00 cGy |
| Colon_Sigmoid          | P2       | D 2.0 cm <sup>3</sup> < 1800 cGy | < 2000.00 cGy |
| Bowel_Small            | P2       | D 2.0 cm <sup>3</sup> < 1800 cGy | < 2000.00 cGy |
| Urethra                | P2       | D 0.1 cm <sup>3</sup> < 2200 cGy | < 2520.00 cGy |
| 500 cGy x 4 Fx = 20 Gy |          |                                  |               |
| CTV_High               | P1       | V 2000 cGy > 95.0 %              | > 90.00%      |
| CTV_Mid                | P1       | V 1600 cGy ≥ 95.0 %              | > 90.00 %     |
| Bladder                | P2       | D 2.0 cm <sup>3</sup> < 2080 cGy | < 2200.00 cGy |
| Rectum                 | P2       | D 2.0 cm <sup>3</sup> < 1480 cGy | < 1800.00 cGy |
| Colon_Sigmoid          | P2       | D 2.0 cm <sup>3</sup> < 1650 cGy | < 1800.00 cGy |
| Bowel_Small            | P2       | D 2.0 cm <sup>3</sup> < 1650 cGy | < 1800.00 cGy |
| Urethra                | P2       | D 0.1 cm <sup>3</sup> < 1650 cGy | < 1800.00 cGy |
| 500 cGy x 5 Fx = 25 Gy |          |                                  |               |
| CTV_High               | P1       | D 90.0 % > 2500 cGy              | > 2250.00 cGy |
| CTV_High               | P1       | V 2500 cGy > 95.0 %              | > 90.00 %     |
| CTV_Mid                | P1       | V 1250 cGy > 95.0 %              | > 90.00 %     |
| Ureter                 | P2       | D 0.1 cm <sup>3</sup> < 2250 cGy | < 2550.00 cGy |
| Bladder                | P2       | D 2.0 cm <sup>3</sup> < 2375 cGy | < 2520.00 cGy |
| Rectum                 | P2       | D 2.0 cm <sup>3</sup> < 1700 cGy | < 2175.00 cGy |
| Colon_Sigmoid          | P2       | D 2.0 cm <sup>3</sup> < 1950 cGy | < 2175.00 cGy |
| Bowel_Small            | P2       | D 2.0 cm <sup>3</sup> < 1950 cGy | < 2175.00 cGy |
| Urethra                | P2       | D 0.1 cm <sup>3</sup> < 2375 cGy | < 2750.00 cGy |
| 800 cGy x 3 Fx = 24 Gy |          |                                  |               |
| CTV_High               | P1       | V 2400 cGy > 95.0 %              | > 90.00%      |
| CTV_Mid                | P1       | V 1200 cGy ≥ 95.0 %              | > 90.00 %     |
| Bladder                | P2       | D 2.0 cm <sup>3</sup> < 1950 cGy | < 2200.00 cGy |
| Rectum                 | P2       | D 2.0 cm <sup>3</sup> < 1410 cGy | < 1770.00 cGy |
| Colon_Sigmoid          | P2       | D 2.0 cm <sup>3</sup> < 1600 cGy | < 1770.00 cGy |
| Bowel_Small            | P2       | D 2.0 cm <sup>3</sup> < 1600 cGy | < 1770.00 cGy |
| Urethra                | P2       | D 0.1 cm <sup>3</sup> < 1600 cGy | < 2220.00 cGy |
